# Supplementary material
Source: PubMed Central journal article supplement (PMC5576895)

# Supplementary Figure 1

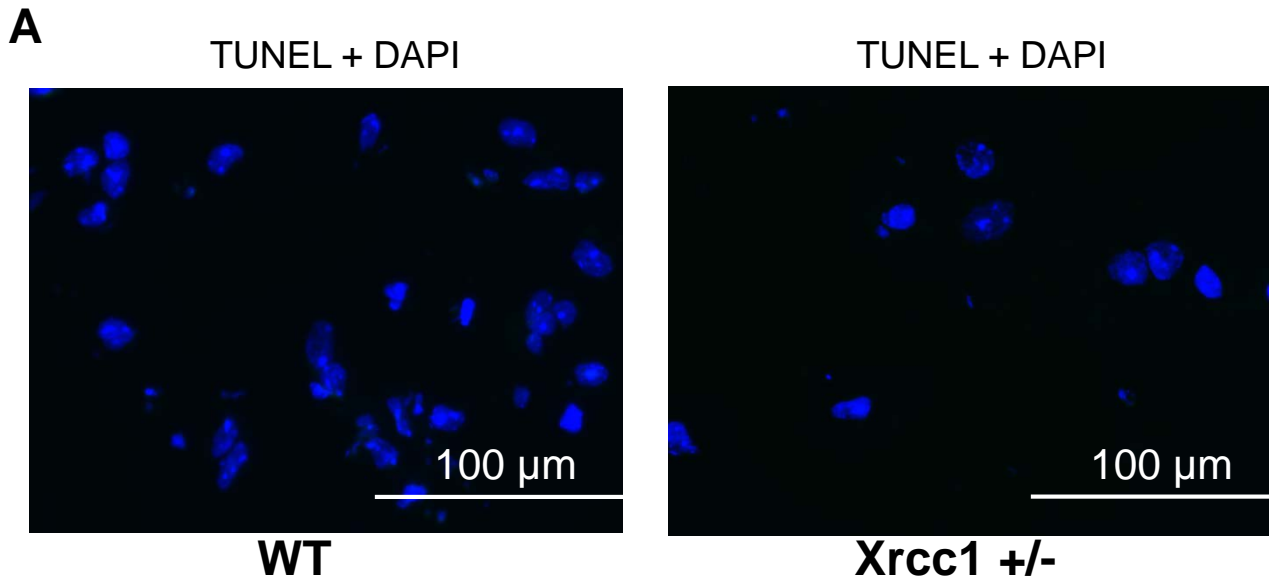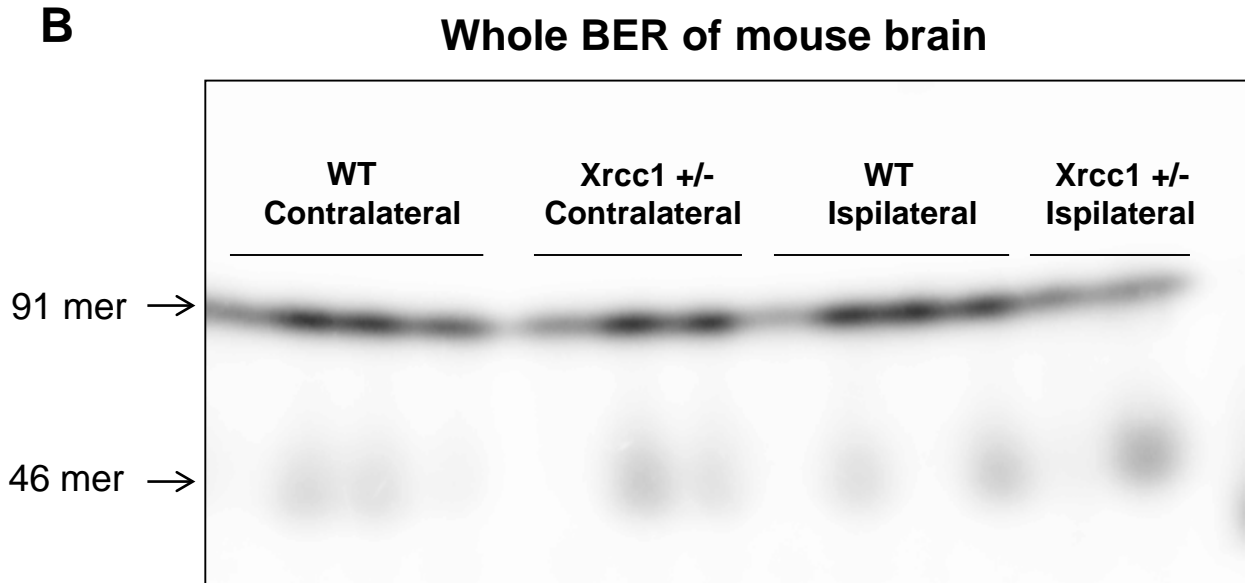

Supplement: NIHMS689604-supplement-1.pdf [file NIHMS689604-supplement-1.pdf]

Supplementary Figure 2

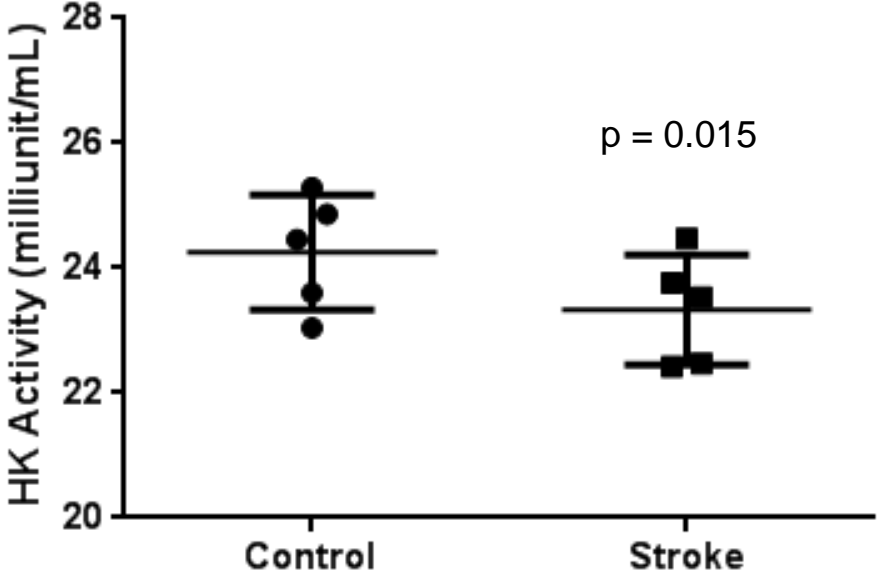

Supplement: NIHMS689604-supplement-2.pdf [file NIHMS689604-supplement-2.pdf]

# Supplementary Figure 3

**A**

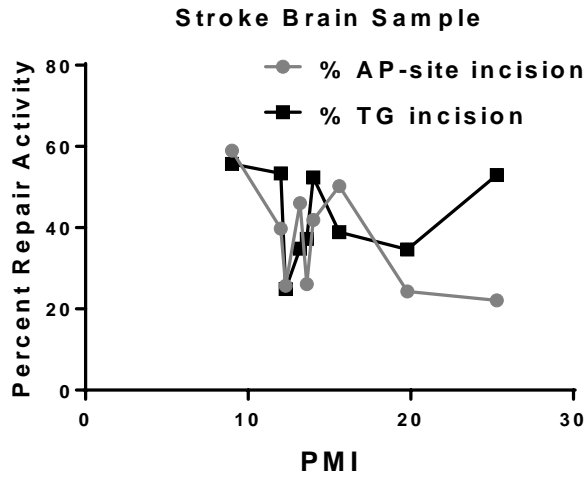

**B**

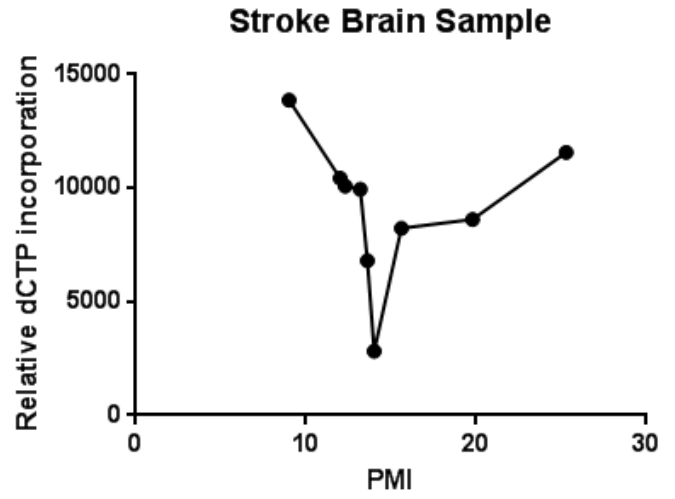

**C**

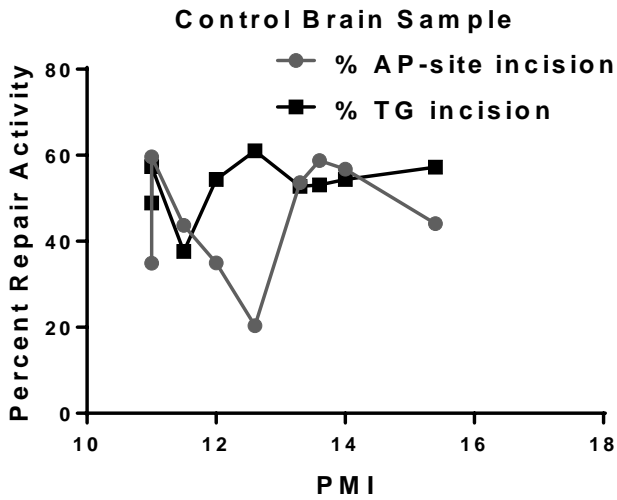

**D**

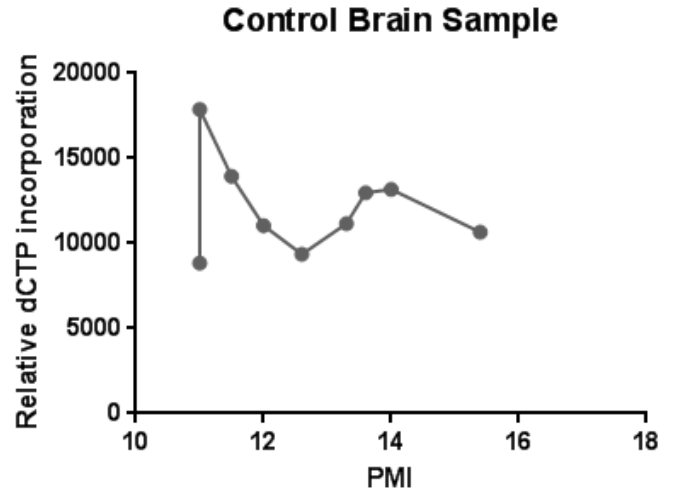

Supplement: NIHMS689604-supplement-3.pdf [file NIHMS689604-supplement-3.pdf]

# Supplementary Figure 4

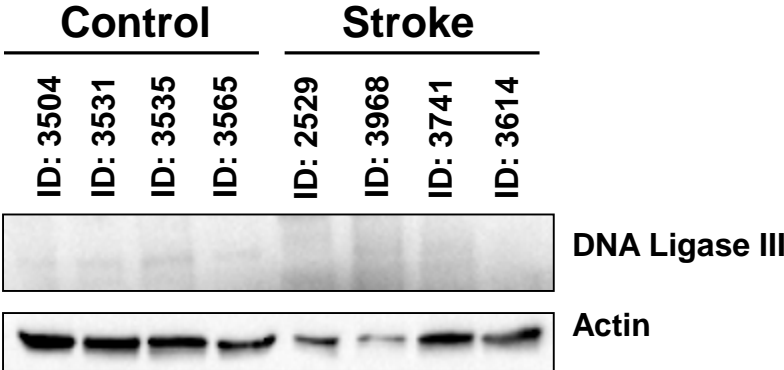

Supplement: NIHMS689604-supplement-4.pdf [file NIHMS689604-supplement-4.pdf]
